# Supplementary material for: Injectable Glycol Chitosan Hydrogel Containing Folic Acid-Functionalized Cyclodextrin-Paclitaxel Complex for Breast Cancer Therapy
Source: PubMed Central journal article supplement (PMC7910883; doi:10.3390/nano11020317), 2021-01-27

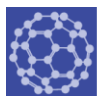

## Supplementary Materials

# Injectable Glycol Chitosan Hydrogel Containing Folic Acid-Functionalized Cyclodextrin-Paclitaxel Complex for Breast Cancer Therapy

Hoon Hyun <sup>1,†</sup>, Min Ho Park <sup>2,†</sup>, Gayoung Jo <sup>1</sup>, Bo Young Lee <sup>1</sup>, Jae Won Choi <sup>3</sup>, Heung Jae Chun <sup>4,5</sup>, Hyeon Soo Kim <sup>5</sup> and Dae Hyeok Yang <sup>5,\*</sup>

<sup>1</sup> Department of Biomedical Sciences, Chonnam National University Medical School, Gwangju 61469, Korea; hhyun@jnu.ac.kr (H.H.); 176250@jnu.ac.kr (G.J.); 196729@jnu.ac.kr (B.Y.L.)

<sup>2</sup> Department of Surgery, Chonnam National University Medical School, Gwangju 61469, Korea; mhpark@jnu.ac.kr

<sup>3</sup> Lumenbio Co. LTD., Seoul 08590, Korea; aa@lumenbio.co.kr

<sup>4</sup> Department of Biomedical & Health Sciences, College of Medicine, The Catholic University of Korea, Seoul 06591, Korea; chunhj@catholic.ac.kr

<sup>5</sup> Institute of Cell and Tissue Engineering, College of Medicine, The Catholic University of Korea, Seoul 06591, Korea; chunhj@catholic.ac.kr (H.J.C.); 21905010@cmcnu.or.kr (H.S.K.)

\* Correspondence: yangdh@catholic.ac.kr; Tel.: +82-2-2258-7497

† These authors contributed equally to this work.

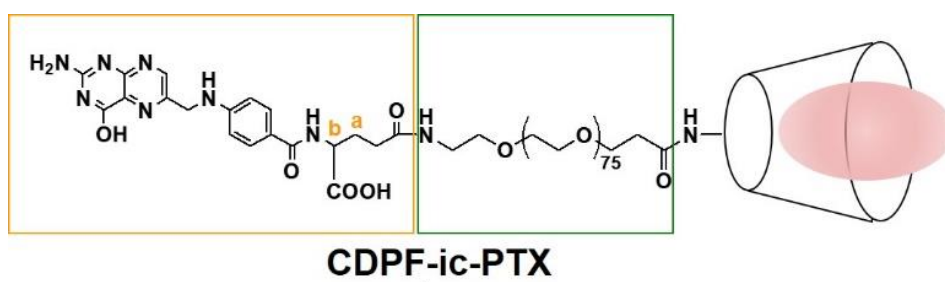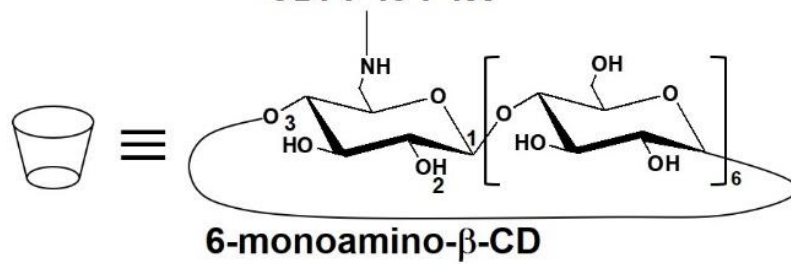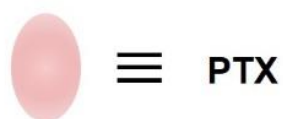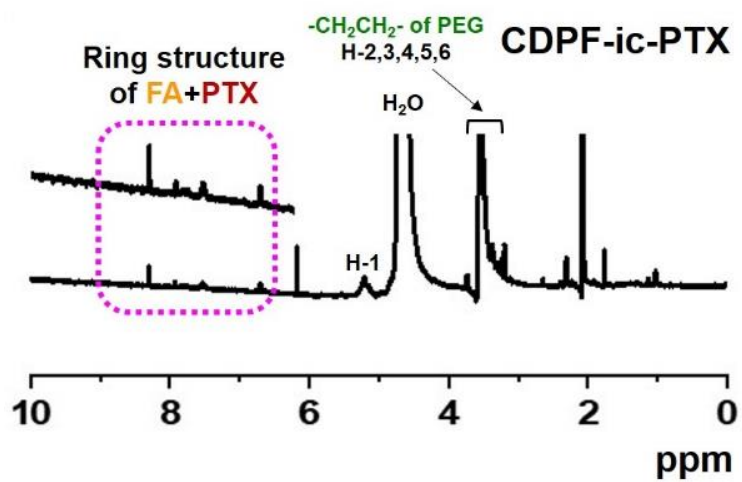

(a)

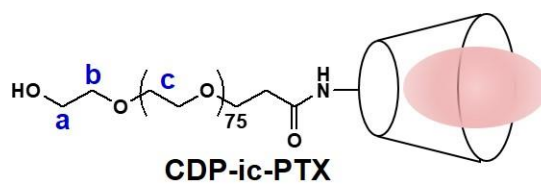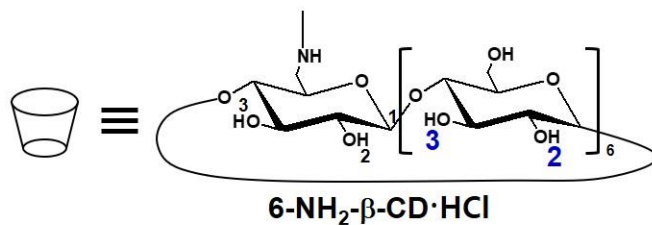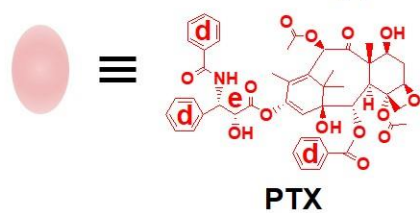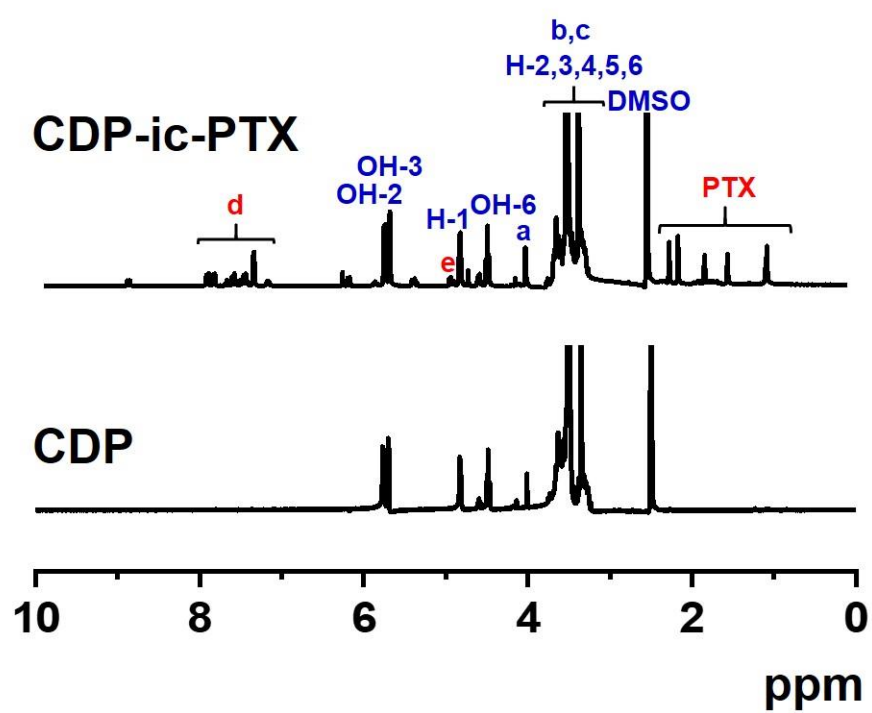

(b)

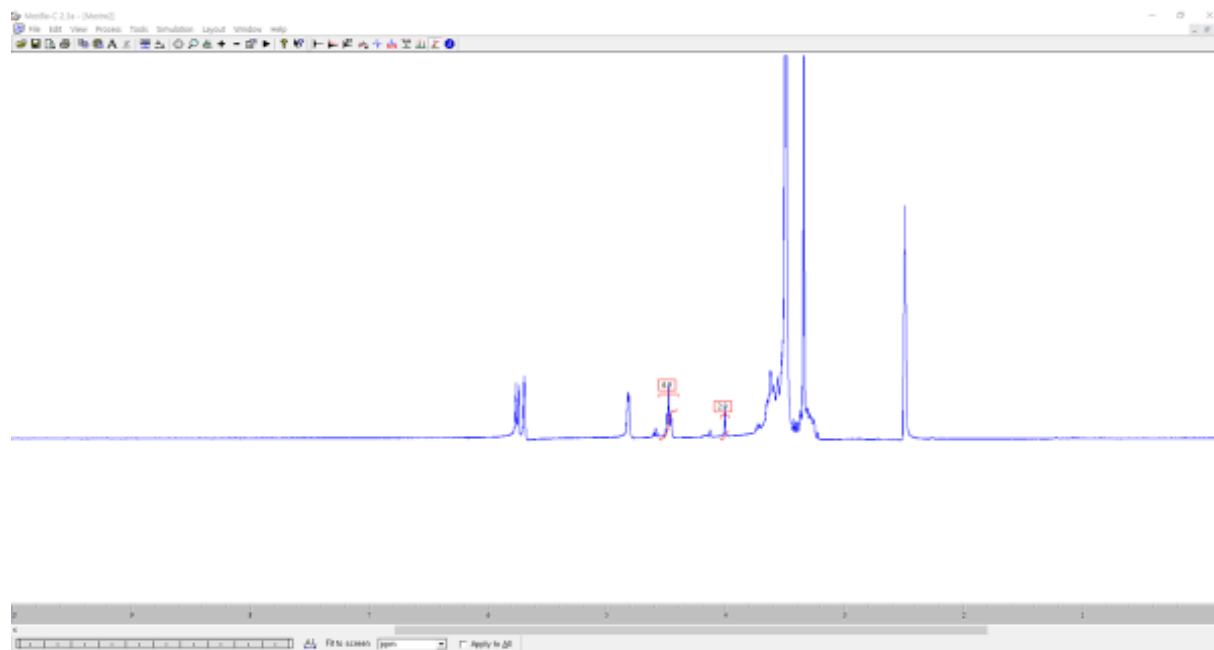

(c)

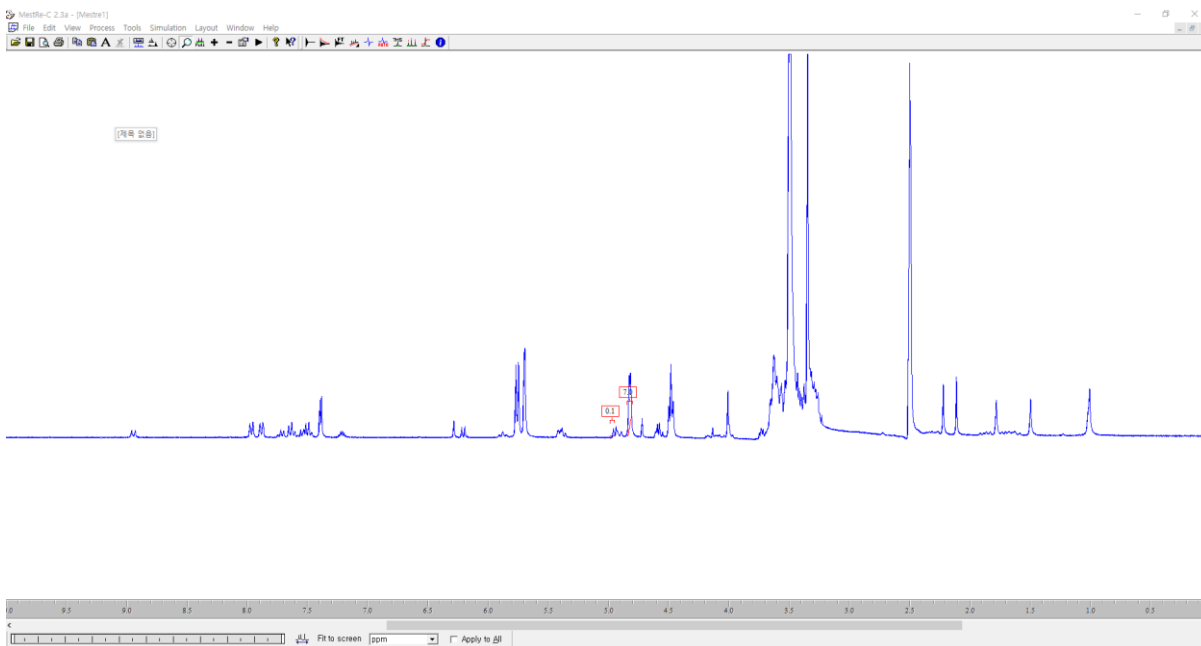

(d)

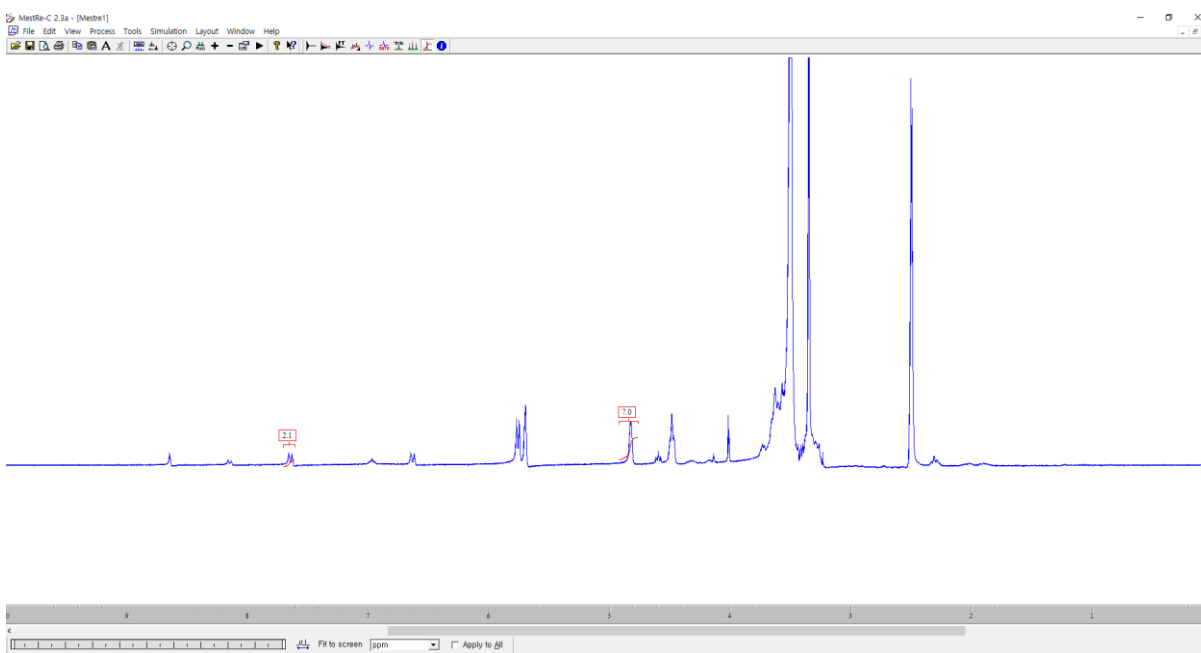

(e)

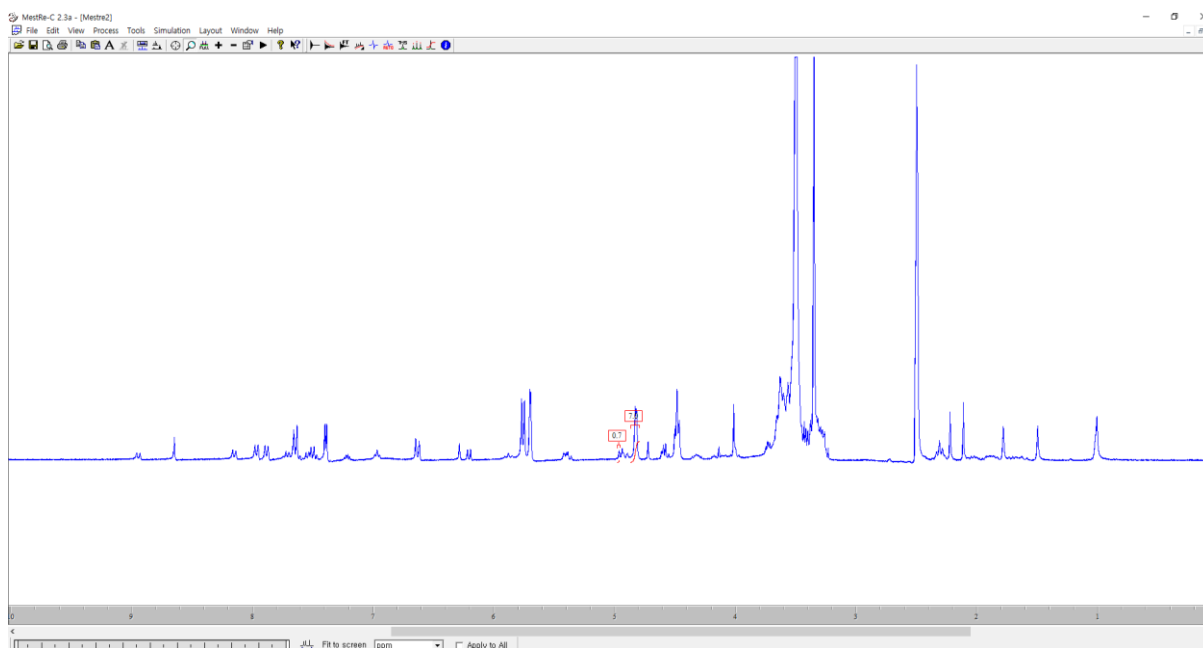

(f)

**Figure S1.** (a)  $^1\text{H}$  NMR spectrum of CDPF-ic-PTX analyzed using  $\text{D}_2\text{O}$ . (b)  $^1\text{H}$  NMR spectra of CDP and CDP-ic-PTX analyzed using  $\text{DMSO-}d_6$ . (c)  $^1\text{H}$  NMR spectrum of CDP. (d)  $^1\text{H}$  NMR spectrum of CDP-ic-PTX. (e)  $^1\text{H}$  NMR spectrum of CDPF. (f)  $^1\text{H}$  NMR spectrum of CDPF-ic-PTX.

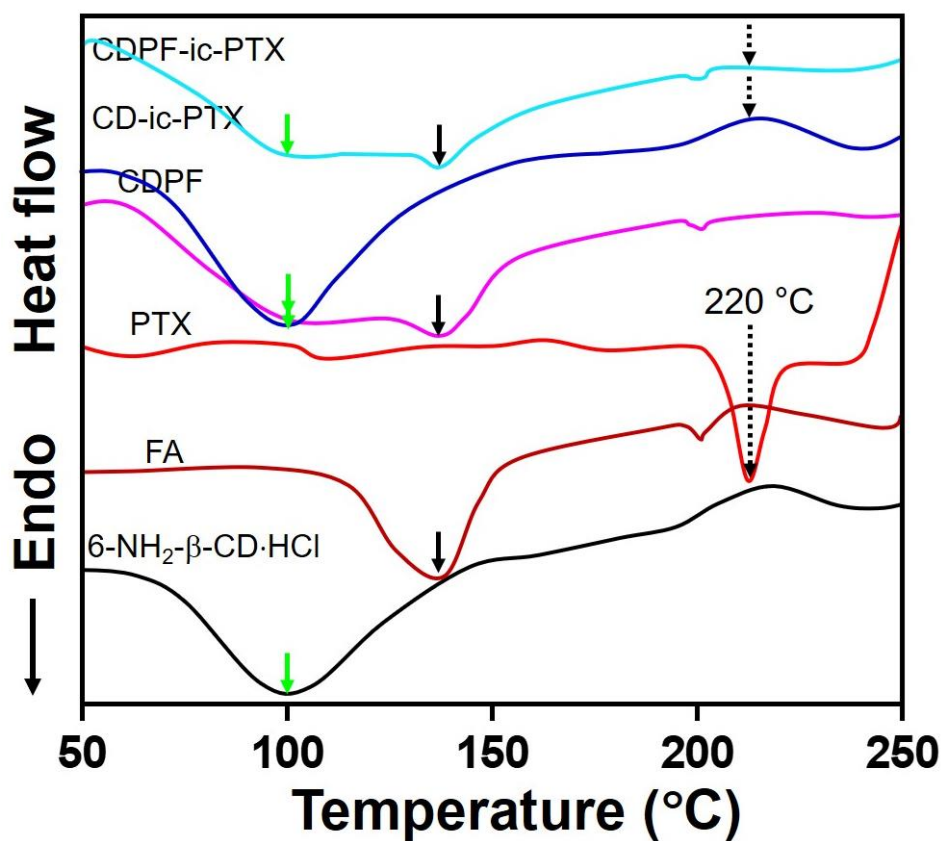

**Figure S2.** DSC curves of 6-NH<sub>2</sub>-β-CD·HCl, FA, PTX, CDPF, CD-ic-PTX, and CDPF-ic-PTX monitored from 50 °C nm to 400 °C. Inclusion complex between CDPF and PTX made the specific endothermic peak (220 °C) of PTX disappear. The green, black, and black dotted lines indicate the endothermic peak positions of 6-NH<sub>2</sub>-β-CD·HCl, FA, and PTX, respectively. Due to the inclusion complex formation between the ring molecules and PTX, CD-ic-PTX, and CDPF-ic-PTX exhibited the disappearance of endothermic peak of PTX.

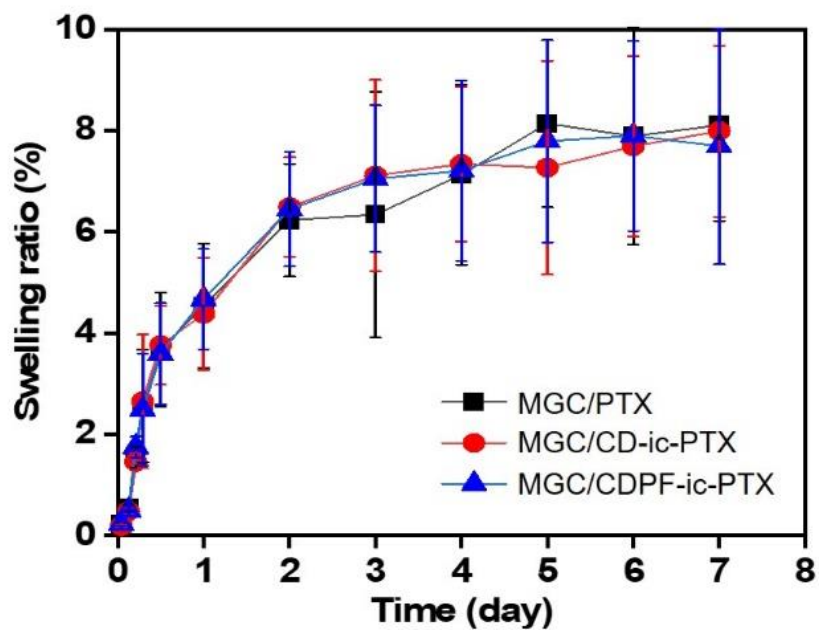

**Figure S3.** Swelling ratio of MGC/PTX, MGC/CD-ic-PTX and MGC/CD-ic-PTX photopolymerizable by visible light irradiation for 10 s, which was measured for 7 days. Three experiments were performed (n = 3).



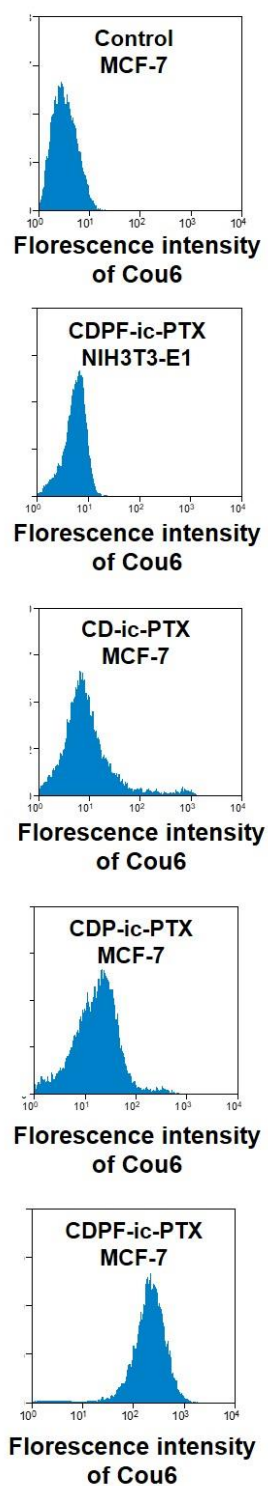

**Figure S4.** Flow cytometry assay of control (MCF-7), CD-ic-PTX/CDP-ic-PTX/CDPF-ic-PTX-treated MCF-7, and CDPF-ic-PTX-treated NIH3T3-E1.

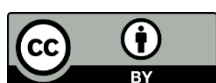

Supplement: nanomaterials-11-00317-s001.pdf [file nanomaterials-11-00317-s001.pdf]
